# Supplementary material for: Interleukin-27 potentiates CD8+ T-cell-mediated antitumor immunity in chronic lymphocytic leukemia
Source: PubMed Central journal article supplement — Haematologica. 2023 Jun 22;108(11):3011–24. doi: 10.3324/haematol.2022.282474 (PMC10620579; doi:10.3324/haematol.2022.282474), 2023-06-22

# Interleukin-27 potentiates CD8<sup>+</sup> T-cell-mediated anti-tumor immunity in chronic lymphocytic leukemia

Giulia Pagano,<sup>1,2\*</sup> Iria Fernandez Botana,<sup>1,2\*</sup> Marina Wierz,<sup>1</sup> Philipp M. Roessner,<sup>3</sup> Nikolaos Ioannou,<sup>4</sup> Xiangda Zhou,<sup>5</sup> Gheed Al-Hity,<sup>4</sup> Coralie Borne,<sup>1</sup> Ernesto Gargiulo,<sup>1</sup> Susanne Gonder,<sup>1,2</sup> Bin Qu,<sup>5</sup> Basile Stamatopoulos,<sup>6</sup> Alan G. Ramsay,<sup>4</sup> Martina Seiffert,<sup>3</sup> Anne Largeot,<sup>1</sup> Etienne Moussay<sup>1#</sup> and Jerome Paggetti<sup>1#</sup>

<sup>1</sup>Tumor Stroma Interactions, Department of Cancer Research, Luxembourg Institute of Health, Luxembourg, Luxembourg; <sup>2</sup>Faculty of Science, Technology and Medicine, University of Luxembourg, Esch-sur-Alzette, Luxembourg; <sup>3</sup>Molecular Genetics, German Cancer Research Center (DKFZ), Heidelberg, Germany; <sup>4</sup>School of Cancer and Pharmaceutical Sciences, Faculty of Life Sciences & Medicine, King's College London, London, UK; <sup>5</sup>Biophysics, Center for Integrative Physiology and Molecular Medicine, School of Medicine, Saarland University, Homburg, Germany and <sup>6</sup>Clinical Cellular Therapy Research Laboratory, Jules Bordet Institute, Brussels, Belgium

*\*GP and IFB contributed equally as first authors.*

*#EM and JP contributed equally as senior authors.*

**Correspondence:** J. Paggetti  
[jerome.paggetti@lih.lu](mailto:jerome.paggetti@lih.lu)

**Received:** November 22, 2022.  
**Accepted:** June 15, 2023.  
**Early view:** June 22, 2023.

<https://doi.org/10.3324/haematol.2022.282474>

Published under a CC BY license

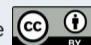

**Interleukin-27 potentiates CD8<sup>+</sup> T cell-mediated anti-tumor immunity in Chronic Lymphocytic Leukemia**

**Materials and Methods**

**Animal experiments**

Leukemic cells derived from *Eμ-TCL1* mice were adoptively transferred (AT) by i.p. or i.v. transplantation ( $1-2 \times 10^7/100\mu\text{l}$  DMEM) into C57BL/6 wild type (WT), *Ebi3*<sup>-/-</sup> (Jax #008691), and *Rag2*<sup>-/-</sup> mice. All murine lines used were of C57BL/6 background. In specific experiments, CLL cells were injected after isolation from the spleen using the MojoSort™ Mouse Pan B Cell Isolation Kit (Biolegend) according to the manufacturer's instructions. Unless stated otherwise, all AT experiments were performed on sex and age-matched mice ranging from six to ten weeks of age. When applicable, CD3<sup>+</sup> T-cells were isolated from WT and *Ebi3*<sup>-/-</sup> splenocytes using the MojoSort™ Mouse CD3 T-cell Isolation Kit (Biolegend) according to the manufacturer's instructions, and co-injected with the *Eμ-TCL1* splenocytes. CLL progression in leukemic mice was monitored weekly by assessment of the percentage of CD5<sup>+</sup> CD19<sup>+</sup> cells in the PB. The blood cell count was determined using the MS4e Vet haematology analyser (Melet-Schloesing, France).

Mice were euthanized by cervical dislocation before reaching the established humane end-point, and the leukemic spleens were dissected and processed as previously described.

*In vivo* treatment with IL-27 neutralizing antibody or isotype IgG control (BioXcell, NH) was performed *i.p.* in *Eμ-TCL1*-AT mice. Antibody administration started two days prior to CLL AT and was repeated twice a week throughout the course of the experiment. For the first two injections, 500μg of anti-IL-27 neutralizing antibody were administered per mouse in 200μl of buffer (Day -2 and day 0). The following injections comprised 250μg of anti-IL-27 antibody in 100μl buffer. Blood serum was obtained weekly during routine blood checks by centrifuging the coagulated PB (2000g, 4°C, 20').

## Flow cytometry

### Cell sorting

CD3<sup>+</sup> T-cells were isolated from *FoxP3<sup>YFP/Cre</sup>* (Jax #016959, C57BL/6 background) and *FoxP3<sup>YFP/Cre</sup> Ebi3<sup>-/-</sup>* mice using MojoSort™ Mouse CD3 T-cell Isolation Kit (Biolegend), and activated with plate-bound anti-CD3 (2µg/ml), anti-CD28 (2µg/ml) and IL-2 (10 ng/mL) for 72 hours. Cells were harvested after three days, stained for surface markers and FACS-sorted using a FACS Aria sorter III (BD Biosciences) in three fractions: CD8<sup>+</sup> T-cells, CD4<sup>+</sup> conventional T-cells and FOXP3<sup>+</sup> regulatory T-cells (Treg, YFP<sup>+</sup>). The samples were immediately spun down (500g, 10'), resuspended in 500 µl of Nucleozol (Takara Bio) and frozen at -80°C.

### Cell clustering

Clustering analysis of live lymphocytes was performed with Cytosplore software. Briefly, samples were randomly down-sampled and subjected to Hierarchical Stochastic Neighbor Embedding (HSNE) to generate clusters based on phenotypic similarities. Clusters were generated using the Gaussian mean shift algorithm using the density estimate as input.

## **T-cell-mediated cytotoxicity assay on murine CLL**

Assessment of the cytotoxicity of IL-27-treated T-cells on murine CLL cells was performed as previously described [1]. Briefly, CD3<sup>+</sup> T-cells were isolated from C57BL/6 mice, cultured in RPMI1640 medium supplemented with 10% FBS, 1% P/S, and stimulated with coated anti-CD3 (1µg/ml) and soluble anti-CD28 (1µg/ml) for 48h at 37°C. Treatment with IL-27 was performed daily (25ng/ml). CLL cells (CD5<sup>+</sup>CD19<sup>+</sup>) isolated from *Eµ-TCL1* mice were stained with CellTrace CFSE (200nM, Thermo Fisher) and pulsed with 2µg/ml of super antigen (sAg; SEA and SEB; Sigma-Aldrich) for 30' at 37°C. The generated target CLL cells (2.5x10<sup>4</sup>) were then loaded with sAg were added to the pre-treated CD3<sup>+</sup> T cells at a 1:20 (target: effector). Cell mixtures were centrifuged, and incubated for 4h at 37°C. Cells were stained with TO-PRO-3 viability dye (Thermo Fisher) according to the manufacturer's instructions and T-cell-mediated cytotoxicity against CLL target cells was determined by flow cytometry. Cytotoxicity was

calculated as: % target cell death = (% CFSE<sup>+</sup> TO-PRO-3<sup>+</sup> target cells incubated with effector T-cells - % of CFSE<sup>+</sup> TO-PRO-3<sup>+</sup> target cells incubated alone) × 100/(100 - % of CFSE<sup>+</sup> TO-PRO-3<sup>+</sup> target cells incubated alone).

### **T-cell-mediated cytotoxicity assay on patient-derived CLL samples**

CLL patient-derived peripheral blood mononuclear cells (PBMCs) were divided into either “target cells” or cells for further processing. The latter were depleted from CD19<sup>+</sup> cells using a positive selection kit, enriched for CD3<sup>+</sup> T cells, and plated with or without IL-27 (100 ng/mL) antibody in 48-well plates previously coated with 1 µg/mL anti-CD3 antibody for 48 h at 37°C.

Prior to the cytotoxicity assay, the target cell fraction CLL cells were stained with CellTrace CFDA (200 nM) (Thermo Fisher) and pulsed with 1 µg/mL of sAgs (SEA and SEB) for 30 min at 37°C. Target cells (2.5×10<sup>4</sup>) loaded with sAg were then added to the pre-treated effector T cells at a 1:20 (target:effector) ratio. Cell mixtures were centrifuged, and the cell pellets incubated for 4 h at 37°C. Target cells from each patient were centrifuged and incubated alone as a control for spontaneous/drug-induced cell death. Finally, cells were stained with TO-PRO-3 viability dye (Thermo Fisher) according to the manufacturer’s instructions and T cell-mediated cytotoxicity against target cells was determined by flow cytometry. Cytotoxicity was calculated as: % target cell death = (% CFDA<sup>+</sup> TO-PRO-3<sup>+</sup> target cells incubated with effector T cells - % of CFSE<sup>+</sup> TO-PRO-3<sup>+</sup> target cells incubated alone) × 100 / (100 - % of CFDA<sup>+</sup> TO-PRO-3<sup>+</sup> target cells incubated alone).

### **Three-dimensional killing assay on human samples**

The real-time killing assay was performed as previously described [2]. In summary, Human CD3/CD28 activator beads (ThermoFisher Scientific) were used to stimulate PBMCs (0.7:1 ratio Beads/PBMCs) with or without IL-27 (100 ng/ml) for 6 days at 37 °C with 5% CO<sub>2</sub>. On day 4, half of the media was replaced by fresh media. For the 3D killing assay, NALM6-pCasper cells [3] were pulsed with SEA and SEB (1µg/ml) at 37 °C with 5% CO<sub>2</sub> for 30 min. The pulsed NALM6-pCasper cells were then embedded

into 2 mg/mL Type I bovine collagen (Advanced Biomatrix) and centrifuged down to the bottom as described before [2]. After gel solidification, PBMCs were placed on top of the collagen matrix at a 20:1 effector: target ratio. Live cell imaging was carried out using a high-content imaging system (ImageXpress, Molecular Devices) at 37 °C with 5% CO<sub>2</sub> for 30 hours. Images were analyzed with ImageJ.

### **RNA sequencing**

Previously sorted cells were thawed and RNA was isolated using the Nucleosol RNA isolation kit (Macherey-Nagel) prior to bulk-RNAseq. Libraries were prepared with the QuantSeq 3' mRNA-Seq Library Prep Kit FWD for Illumina (Lexogen), according to manufacturer's instructions, with the addition of UMI. Barcoded samples were pooled, diluted, loaded onto a NextSeq 500/500 Mid Output flowcell (130M reads, Illumina) and single-end sequencing was performed on a NextSeq 550 (Illumina).

### RNA sequencing analysis

After initial QC's using FastQC and FastQ Screen tools made available by the Babraham Bioinformatics group (<https://www.bioinformatics.babraham.ac.uk/projects>), fastq files were processed using a local Snakemake workflow including the following main steps. First, raw reads were trimmed from their UMI index, poly A and adapter sequences using a combination of dedicated scripts and cutadapt (v2.10). Next, filtered reads were submitted for mapping (STAR v2.5.3a) on the Mouse Reference genome (GRCm38). Collapsing of reads originating from the same fragment was achieved with umi\_tools (v1.0.0) and counting was performed with featureCounts (subread v2.0.0).

Counts were filtered and transformed with EdgeR for clustering and principal component analysis (PCA). Differential expression of genes (DEG) across CD8<sup>+</sup> T-cells, Tconv and Treg cell samples was assessed using the NOISeq R/Bioconductor packages, and a FDR of 0.05 and a log<sub>2</sub> fold change cut-off of 1 were imposed.

## **Immunofluorescence**

$1 \times 10^6$  cells were transferred in a U-bottom 96 well plate. PFA was added at a final concentration of 3.7%. After 15min of incubation at RT, the cells were washed with PBS, and centrifuged at 500g for 5min. Cells were permeabilized with 0.5% Triton x-100 in PBS for 15min at RT. After 2 washes with PBS, cells were blocked with the blocking buffer (1% BSA, 0.5% Triton X-100 in PBS) for 1h at RT. After washes, cells were incubated o.n. with the primary antibodies diluted in blocking buffer (anti-Profilin1, Cell Signalling, #3237, AB\_2236990 and anti-CD8, Biolegend, #100705, AB\_312744).

After 3 washes of 10min in permeabilization buffer, the cells were incubated 1h at RT with the secondary antibodies. The cells were then washed 3 times for 10min in permeabilization buffer. DAPI and actistain were added in the second wash. The cells were resuspended in Ibidi mounting medium and let to settle for 24h at 4°C in an Ibidi chamber ( $\mu$ -Slide angiogenesis). Images were acquired on a confocal laser scanning microscope (LSM810; Zeiss) and analyzed with ImageJ.

## **Cytokine measurements**

The levels of IL-27 in patient blood serum, as well as in murine blood serum and spleen plasma were quantified by ELISA using the LEGEND MAX™ Human IL-27 ELISA Kit (Biolegend) and LEGEND MAX™ Mouse IL-27 Heterodimer ELISA Kit (Biolegend), respectively, according to the manufacturer's instructions. Equal volumes of serum or spleen plasma were loaded across conditions.

## **Real-time PCR**

### Cell populations sorting

Leukemic C57BL/6 wild type (WT), previously AT with *E $\mu$ -TCL1*-derived splenocytes, were euthanized before reaching the humane end-point and the leukemic spleens were dissected and processed. Cell suspensions were then stained for surface markers and sorted into five fractions using a Symphony sorter (BD Biosciences): CLL cells (CD19<sup>+</sup>), CD8<sup>+</sup> T-cells (CD19<sup>-</sup> NK1.1<sup>-</sup> CD3<sup>+</sup>CD8<sup>+</sup>CD4<sup>-</sup>) CD4<sup>+</sup> T-cells (CD19<sup>-</sup>

NK1.1<sup>-</sup>CD3<sup>+</sup>CD8<sup>-</sup>CD4<sup>+</sup>), dendritic cells (CD19<sup>-</sup>NK1.1<sup>-</sup>Ly-6G<sup>-</sup>CD11c<sup>+</sup>CD11b<sup>+</sup>) and monocytes/macrophages (CD19<sup>-</sup>NK1.1<sup>-</sup>Ly-6G<sup>-</sup>CD11c<sup>-</sup>CD11b<sup>+</sup>). The sorted populations were immediately spun down (500g, 10min), resuspended in Nucleozol and frozen at -80°C.

#### RNA isolation

RNA from whole splenocytes or sorted cell types was isolated using the NucleoSpin RNA Set for NucleoZOL Mini kit according to manufacturer's instructions (Macherey-Nagel) and quantified with Nanodrop (Thermo Scientific).

#### Gene expression in cells

Reverse transcription of mRNA was performed in a SimpliAmp™ Thermal Cycler (ThermoFisher) using FastGene® Scriptase II cDNA 5x ReadyMix (Nippon genetics). Real-time PCR was performed in the QuantStudio™ 5 Real-Time PCR System (ThermoFisher) using the Takyon Low Rox SYBR 2XMaster Mix blue dTTP (Eurogentec). The primer sequences were as follows: *Ebi3* F: 5'- CTTCTCGGTATCCCGTGGC - 3' and R: 5'- ACCGAGCCTGTAAGTGGCAAT -3', *Il27p28* F: 5'- TGTCCACAGCTTTGCTGAAT-3' and R: 5'- CCGAAGTGTGGTAGCGAGG-3', *18S* F: 5'- CCGCCGCCATGTCTCTAGT-3' and R: 5'- CTTTCCTCAACACCACATGAGC-3'

#### **Analysis of publicly available data sets**

For the analysis of *Ebi3* gene expression, we collected raw or processed data from the GSE18026, GSE35179, GSE66858, GSE8835, and GSE8836 datasets (GEO database, NCBI). We used gene expression data from several CD8<sup>+</sup> T-cell populations for comparison [4]. Expression of differentially expressed genes from clusters 1-10 was gathered for PCA and clustering analysis.

1. Ioannou, N., et al., *Triggering interferon signaling in T cells with avadomide sensitizes CLL to anti-PD-L1/PD-1 immunotherapy*. Blood, 2021. **137**(2): p. 216-231.
2. Zhao, R., et al., *Targeting the Microtubule-Network Rescues CTL Killing Efficiency in Dense 3D Matrices*. Front Immunol, 2021. **12**: p. 729820.
3. Knorck, A., et al., *Cytotoxic Efficiency of Human CD8(+) T Cell Memory Subtypes*. Front Immunol, 2022. **13**: p. 838484.
4. Beltra, J.C., et al., *Developmental Relationships of Four Exhausted CD8(+) T Cell Subsets Reveals Underlying Transcriptional and Epigenetic Landscape Control Mechanisms*. Immunity, 2020. **52**(5): p. 825-841 e8.

## **Figure legends**

**Figure S1: *Ebi3*<sup>-/-</sup> transgenic mice do not produce IL-27 and display a TME with immunosuppressive features.**

**(A)** Relative mRNA levels of the IL-27 subunits, p28 and *Ebi3*, in splenocytes of WT and *Ebi3*<sup>-/-</sup> mice. **(B)** Number of circulating neoplastic CD5<sup>+</sup> CD19<sup>+</sup> cells (n=18 for Ctrl and n=19 for *Ebi3*<sup>-/-</sup>, two-way ANOVA), same mice as Fig 1A. **(C)** Experimental scheme and relative mRNA levels of the IL-27 subunits (*Ebi3* and *Il27p28*) in murine CLL cells, CD8<sup>+</sup> T cells, CD4<sup>+</sup> T cells, dendritic cells, monocytes/macrophages (relative to the housekeeping gene 18S) sorted from the spleen of leukemic mice (AT with TCL1 splenocytes; n=4). **(D-I)** The data shown corresponds to one experimental cohort of AT mice (n=9 for Ctrl and n=10 for *Ebi3*<sup>-/-</sup>) as for Fig.1B-F **(D)** Cell numbers of CD8<sup>+</sup> T cells, CD4<sup>+</sup> Tconv, and Tregs in the spleen are compared between the two groups. **(E)** HSNE plots (Cytosplore) and heatmap depicting the expression of CD44, Ki-67, PD1, IFN- $\gamma$ , TIGIT and CD62L on Ctrl and *Ebi3*<sup>-/-</sup> CD8<sup>+</sup> T cells. **(F)** Percentages of CD8<sup>+</sup> T-cell cluster distribution in Ctrl and *Ebi3*<sup>-/-</sup> CD8<sup>+</sup> T cells. **(G)** Frequency of CD4<sup>+</sup> Tconv with a naive (CD62L<sup>+</sup> CD44<sup>-</sup>), effector (CD62L<sup>-</sup> CD44<sup>+</sup>) or memory (CD62L<sup>+</sup> CD44<sup>+</sup>) phenotype among Ctrl and *Ebi3*<sup>-/-</sup> mice. **(H)** HSNE plots (Cytosplore) and heatmap depicting the expression of CD44, Foxp3, Ki-67, PD-1, IFN- $\gamma$ , TIGIT and CD62L expression measured by FC on Ctrl and *Ebi3*<sup>-/-</sup> CD4<sup>+</sup> T cells. **(I)** Percentages of cluster distribution on Ctrl and *Ebi3*<sup>-/-</sup> CD4<sup>+</sup> T cells. Unpaired t test, \*  $P < .05$ , \*\*  $P < .01$ , \*\*\*  $P < .001$ , \*\*\*\*  $P < .0001$ .

**Figure S2: EBI3 depletion does not affect myeloid cell compartment and mildly affects T-cell distribution in a non-tumoral context.**

**(A-F)** Healthy *Foxp3*<sup>YFP/Cre</sup> and *Foxp3*<sup>YFP/Cre</sup> *Ebi3*<sup>-/-</sup> mice (n=3 per group) were euthanized at 8 weeks of age and their splenocytes analyzed using FC. **(A)** Frequency of indicated cell populations among total live cells. T= T cells; NK= Natural killer cells; NKT= natural killer T cells; Myelo= myeloid cells. **(B)** Frequency of indicated cell populations out of CD11b<sup>+</sup> cells. Neutro=neutrophils; DCs=dendritic cells; Mono=monocytes; Macro=macrophages. **(C)** Frequency of T-cell subpopulations among total T cells.

**(D-F)** CD8<sup>+</sup> and CD4<sup>+</sup> T cells were isolated from *Foxp3*<sup>YFP/Cre</sup> and *Foxp3*<sup>YFP/Cre</sup> *Ebi3*<sup>-/-</sup> splenocytes, stimulated *ex vivo* with PMA (80nM), ionomycin (1,3 mM) and brefeldin A (5μg/ml) and analyzed by FC. Frequency of indicated immune checkpoints and cytokines in **(D)** CD8<sup>+</sup> effector T cells, **(E)** CD4<sup>+</sup> Tconv cells and **(F)** Tregs after *ex vivo* stimulation. Unpaired t test, \*\* *P* < .01.

**Figure S3: EBI3 depletion in transgenic Eμ-TCL1 mice promotes an immunosuppressive TME.**

**(A)** Number of circulating leukemic cells in T and TE mice (n=17 in T mice and n=14 in TE mice). **(B-J)** Leukemic T and TE mice were euthanized and their splenocytes were processed and analyzed by FC (n=5 in T mice and n=6 in TE mice). **(B)** Percentage of CLL cells among splenocytes of T and TE mice. **(C)** Number of CLL cells in the spleen of T and TE mice. **(D)** Heatmap and HSNE plots depicting the expression of individual markers included in the clustering analysis of CD8<sup>+</sup> T cells derived from T and TE transgenic mice based on the expression of CD44, Ki-67, PD1, KLRG1, TIGIT, and CD62L measured by FC. **(E)** Percentages of CD8<sup>+</sup> T-cell clusters distribution on T and TE. **(F)** Percentage of CD4<sup>+</sup> T cells in the spleen of T and TE transgenic mice. **(G-H)** HSNE clustering analysis of T and TE CD4<sup>+</sup> T cells based on the expression of CD44, FOXP3, Ki-67, PD1, KLRG1 and CD62L measured by FC. Heatmap comprising the clusters and HSNE plots depicting the expression of individual markers. **(I)** Percentages of cluster distribution in CD4<sup>+</sup> T cells in T and TE mice. **(J)** CLL cells were isolated from T and TE mice (n=3 mice per group) and activated for 48h *in vitro*. CLL cells were stained and analyzed by FC. Unpaired t test, \* *P* < .05, \*\* *P* < .01.

**Figure S4: Specific T-cell-EBI3 depletion leads to a more immunosuppressive TME.**

**(A)** Number of circulating T cells in recipient *Rag2*<sup>-/-</sup> mice injected with either Ctrl or *Ebi3*<sup>-/-</sup> CD3<sup>+</sup> T cells. **(B)** HSNE clustering analysis of Ctrl and *Ebi3*<sup>-/-</sup> CD8<sup>+</sup> T cells based on PD1, CD25, LAG3, CD127, TIGIT and CD44 expression measured by FC. Heatmap comprising the clusters generated by HSNE analysis and HSNE plots depicting the expression of individual markers. **(C)** Percentages of cells in clusters from CD8<sup>+</sup> T cells isolated from the spleen of recipient *Rag2*<sup>-/-</sup> mice. **(D)** HSNE clustering analysis of Ctrl and

*Ebi3*<sup>-/-</sup> CD4<sup>+</sup> T cells based on ROR-γt, FOXP3, CD25, Ki-67, GATA3, CD103, T-bet, and GITR expression measured by FC. Heatmap comprising the clusters generated by HSNE analysis and HSNE plots depicting the expression of individual markers. **(E)** Percentages of cluster distribution in WT and *Ebi3*<sup>-/-</sup> CD4<sup>+</sup> T cells. Unpaired t test, \* *P* < .05.

**Figure S5: CD8<sup>+</sup> T cells, but not Tconv or Tregs, show major transcriptional changes in the absence of EB13.**

**(A)** Heatmap comparing the transcriptome of Ctrl and *Ebi3*<sup>-/-</sup> CD8<sup>+</sup> T cells. **(B)** Heatmaps depicting the transcriptional changes associated with translation initiation (left) and rRNA processing (right) between Ctrl and *Ebi3*<sup>-/-</sup> CD8<sup>+</sup> T cells. **(C)** Heatmap depicting the similarity of *Ebi3*<sup>-/-</sup> CD8<sup>+</sup> T cells with subsets of exhausted T cells described in [4]. **(D)** Principal component analysis (PCA) of *Ebi3*<sup>-/-</sup> CD8<sup>+</sup> T cells with the aforementioned subsets. **(E-F)** Volcano plot showing differentially expressed genes (DEG) in Ctrl and *Ebi3*<sup>-/-</sup> **(E)** Tregs and **(F)** Tconv.

**Figure S6: *Ebi3* depletion in CD8<sup>+</sup> T cells does not affect cytokine production after 3 days of activation.**

**(A)** Frequency of cells expressing the selected markers in Ctrl vs *Ebi3*<sup>-/-</sup> CD8<sup>+</sup> T cells after 3 days of activation. **(B-C)** HSNE clustering analysis of Ctrl and *Ebi3*<sup>-/-</sup> CD8<sup>+</sup> T cells based on IL-2, Ki-67, IFN-γ, CD44, CD39 and Granzyme B expression measured by FC at day 3 post activation. HSNE plots depicting the expression of individual markers. **(D)** Percentages of cluster distribution of Ctrl vs *Ebi3*<sup>-/-</sup> CD8<sup>+</sup> T cells after 6 days of activation. **(E)** Cytotoxicity of *Ebi3*<sup>-/-</sup> CD8<sup>+</sup> T cells in absence or presence of IL-27 against TCL1 splenocytes. **(F)** Experimental design of the 3D killing assay. Human PBMCs were isolated from four healthy donors and activated *in vitro* for 6 days in presence or absence of rhIL-27. At day 6, pulsed NALM6 cells transfected with the viability pCasper vector were added to the culture for 30h and live cell imaging was recorded. (scale bar, 50μm) Percentage of living target cells was calculated in the 3 conditions (activated PBMCs only, and in presence or absence of IL-27). **(G)** Bar chart showing the percentage of living target cells 10 hours after the start of the killing activity of CD8<sup>+</sup> T cells. **(H)**

Individual plots representing the kinetic of cell killing for the four donors. Unpaired t test, \*\*  $P < .01$ , \*\*\*  $P < .001$ .

**Figure S7: IL-27 does not affect human and murine CLL cells**

**(A)** Relative gene expression of *EBI3* in different human cell subsets in CLL patients and healthy controls. **(B)** Relative gene expression of *Ebi3* in different murine cell subsets in Ctrl and *Eμ-TCL1* mice. **(C)** Viability **(D)** and phenotype of patient-derived CLL cells after 48h of treatment with increasing levels of IL-27. **(E)** Viability and **(F)** phenotype of *Eμ-TCL1*-derived splenocytes after 48h of treatment with increasing levels of IL-27. Unpaired T test, \*  $P < .05$ , \*\*  $P < .01$ .

**Figure S8: IL-27 neutralization partially recapitulates the less immunosuppressive microenvironment observed in the transgenic mouse model.**

**(A)** Percentage of CD8<sup>+</sup> T among total T cells. **(B-C)** HSNE clustering analysis of splenic CD8<sup>+</sup> T cells from isotype- and α-IL-27-treated mice based on CD62L, TIGIT, KLRG1, PD1, Ki-67, and CD44 expression measured by FC. Heatmap comprising the clusters generated by HSNE analysis and HSNE plots depicting the expression of individual markers **(D)** Percentages of cluster distribution between CD8<sup>+</sup> T cells derived from the spleen of isotype- or α-IL-27-treated mice. **(E)** Percentage of CD4<sup>+</sup> T cells out of total T cells. **(F)** Percentage of Tconv and Tregs out of CD4<sup>+</sup> T cells. **(G)** Frequency of the indicated Treg populations. **(H)** HSNE clustering analysis and heatmap of splenic CD4<sup>+</sup> T cells from isotype- and α-IL-27-treated mice based on CD62L, TIGIT, KLRG1, PD1, Ki-67, and CD44 expression measured by FC. **(H)** Percentages of cluster distribution between splenic CD4<sup>+</sup> T cells from isotype- or α-IL-27-treated mice. Unpaired T test, \*  $P < .05$ .

**Supplemental Table 1: List of antibodies used in flow cytometry**

| Antigen      | Fluorochrome | Clone    | Specificity | Manufacturer | Product #   | Other name     | RRIDs       |
|--------------|--------------|----------|-------------|--------------|-------------|----------------|-------------|
| CD103        | APC          | 2E7      | Mouse       | Biolegend    | 121414      |                | AB_1227502  |
| CD11b        | PE-Cy7       | M1/70    | Mouse/Human | Biolegend    | 101215      |                | AB_312798   |
| CD11c        | APC-V770     | 1B29     | Mouse       | Miltenyi     | 130-107-461 |                | AB_2783921  |
| CD134        | APC          | REA625   | Mouse       | Miltenyi     | 130-109-742 | OX40           | AB_2654942  |
| CD152        | PE           | UC10-4B9 | Mouse       | Biolegend    | 106305      | CTLA4          | AB_313255   |
| CD19         | FITC         | eBio1D3  | Mouse       | ThermoFisher | 11-0193-86  |                | AB_657665   |
| CD19         | PE-Cy7       | eBio1D3  | Mouse       | ThermoFisher | 25-0193-82  |                | AB_657663   |
| CD19         | APC          | 6D5      | Mouse       | Biolegend    | 115512      |                | AB_313647   |
| CD19         | Biotin       | 6D5      | Mouse       | Miltenyi     | 130-101-951 |                | AB_2801732  |
| CD25         | BV421        | PC61     | Mouse       | Biolegend    | 102043      | IL-2R $\alpha$ | AB_11203373 |
| CD25         | FITC         | REA568   | Mouse       | Miltenyi     | 130-108-999 |                | AB_2656653  |
| CD25         | BV421        | PC61     | Mouse       | Biolegend    | 102043      |                | AB_2562611  |
| CD279        | BV510        | 29F.1A12 | Mouse       | Biolegend    | 135241      | PD-1           | AB_2715761  |
| CD3          | PerCP        | 1B8      | Mouse       | Biolegend    | 100326      |                | AB_893317   |
| CD3          | Biotin       | 1B3      | Mouse       | Miltenyi     | 130-109-835 |                | AB_2751822  |
| CD357        | PerCP/Cy5.5  | DTA-1    | Mouse       | Biolegend    | 126316      | GITR           | AB_2563384  |
| CD39         | PE-Cy7       | Duha59   | Mouse       | Biolegend    | 143805      |                | AB_2563393  |
| CD4          | APC-Fire 750 | 1B13     | Mouse       | Biolegend    | 100568      |                | AB_2629699  |
| CD4          | APC-Cy7      | RM4-5    | Mouse       | Biolegend    | 100526      |                | AB_312727   |
| CD44         | FITC         | IM7      | Mouse       | Biolegend    | 103022      |                | AB_312957   |
| CD44         | AF700        | IM7      | Mouse       | Biolegend    | 103026      |                | AB_493713   |
| CD44         | PE           | IM7      | Mouse       | Biolegend    | 103008      |                | AB_312959   |
| CD44         | APC          | IM7      | Mouse/Human | Biolegend    | 103012      |                | AB_312963   |
| CD5          | PE           | 53-7.3   | Mouse       | Biolegend    | 100608      |                | AB_312737   |
| CD5          | APC          | 53-7.3   | Mouse       | Biolegend    | 100626      |                | AB_2563929  |
| CD62L        | PE-Cy7       | MEL-14   | Mouse       | Biolegend    | 104418      |                | AB_313103   |
| CD69         | AF700        | FN50     | Human       | Biolegend    | 310922      |                | AB_493775   |
| CD73         | APC          | TY/11.8  | Mouse       | Biolegend    | 127209      |                | AB_11218786 |
| CD8          | BV650        | 1B21     | Mouse       | Biolegend    | 100742      |                | AB_2563056  |
| F4/80        | BV421        | BM8      | Mouse       | Biolegend    | 123137      |                | AB_11203717 |
| Foxp3        | APC          | REA788   | Mouse       | Miltenyi     | 130-111-601 |                | AB_2651766  |
| Foxp3        | BV488        | MF-14    | Mouse       | Biolegend    | 126406      |                | AB_1089113  |
| GATA3        | BV421        | 16E10A23 | Mouse/Human | Biolegend    | 653814      |                | AB_2563221  |
| Granzyme B   | PE           | QA16A02  | Mouse/Human | Biolegend    | 372208      |                | AB_2687032  |
| HLA-A,B,C    | PE-Cy7       | W6/32    | Human       | Biolegend    | 311430      |                | AB_2561617  |
| IFN $\gamma$ | BV711        | XMG1.2   | Mouse       | Biolegend    | 505836      |                | AB_2650928  |
| IL-10        | BV421        | JES3-9D7 | Human       | Biolegend    | 501421      |                | AB_10896947 |

|                                                       |             |             |             |              |             |         |             |
|-------------------------------------------------------|-------------|-------------|-------------|--------------|-------------|---------|-------------|
| <b>IL17A</b>                                          | PE          | TC11-18H10  | Mouse       | Miltenyi     | 130-102-344 |         | AB_2660786  |
| <b>IL2</b>                                            | PE-Cy7      | JES6-5H4    | Mouse       | Biolegend    | 503832      |         | AB_2561750  |
| <b>Ki-67</b>                                          | BV421       | 16A8        | Mouse       | Biolegend    | 652411      |         | AB_2562663  |
| <b>Ki-67</b>                                          | APC         | 16A8        | Mouse       | Biolegend    | 652406      |         | AB_2561930  |
| <b>Ki-67</b>                                          | BV421       | 16A8        | Mouse       | Biolegend    | 652411      |         | AB_2562663  |
| <b>KLRG1</b>                                          | BV711       | 2F1/KLRG1   | Mouse       | Biolegend    | 138427      | MAFA    | AB_2629721  |
| <b>LAG-3</b>                                          | BV421       | C9B7W       | Mouse       | Biolegend    | 125221      | CD223   | AB_2572080  |
| <b>LAG-3</b>                                          | APC         | 7H2C65      | Human       | Biolegend    | 369211      | CD223   | AB_2728372  |
| <b>Ly6c</b>                                           | PE          | 1G7.G10     | Mouse       | Miltenyi     | 130-102-391 |         | AB_2857638  |
| <b>Ly6G</b>                                           | Biotin      | REA526      | Mouse       | Miltenyi     | 130-107-911 | Gr-1    | AB_2727584  |
| <b>MHC-DR</b>                                         | APC         | L243        | Human       | Biolegend    | 980406      |         | AB_2650655  |
| <b>MHC-I</b>                                          | PE          | 28-8-6      | Mouse       | Biolegend    | 114607      |         | AB_313598   |
| <b>MHC-II</b>                                         | BV650       | M5/114.15.2 | Mouse       | Biolegend    | 107641      | I-A/I-E | AB_2565975  |
| <b>NK1.1</b>                                          | Biotin      | PK136       | Mouse       | Miltenyi     | 130-101-888 | CD161   | AB_2727573  |
| <b>PD-L1</b>                                          | APC         | 29E2A3      | Human       | Biolegend    | 329707      | CD274   | AB_940358   |
| <b>PD-L1</b>                                          | APC         | 29E2A3      | Human       | Biolegend    | 329707      | CD274   | AB_940358   |
| <b>RORg (t)</b>                                       | PE          | B2D         | Mouse       | eBioscience  | 2054914     |         | AB_10805392 |
| <b>Tbet</b>                                           | PE-Cy7      | 4B10        | Mouse/Human | Biolegend    | 644823      |         | AB_2561760  |
| <b>TGF-β</b>                                          | PerCP/Cy5.5 | TW7-16B4    | Mouse       | Biolegend    | 141409      |         | AB_2561591  |
| <b>TIGIT</b>                                          | PE          | GIGD7       | Mouse       | eBiosciences | 12-950182   |         | AB_11042152 |
| <b>TNFα</b>                                           | APC         | MP6-XT22    | Mouse       | Biolegend    | 506308      |         | AB_315429   |
| <b>TOX</b>                                            | PE          | TXRX10      | Mouse       | eBioscience  | 12-6502-82  |         | AB_10855034 |
| <b>eBioscience™ Fixable Viability Dye eFluor® 506</b> |             |             |             | ThermoFisher | 65-0866-18  |         |             |
| <b>Zombie Green™ Fixable Viability Kit</b>            |             |             |             | Biolegend    | 423111      |         |             |
| <b>Zombie RED™ Fixable Viability Kit</b>              |             |             |             | Biolegend    | 423109      |         |             |
| <b>Zombie UV™ Fixable Viability Kit</b>               |             |             |             | Biolegend    | 423108      |         |             |
| <b>Zombie NIR™ Fixable Viability Kit</b>              |             |             |             | Biolegend    | 423106      |         |             |

**Figure S1**

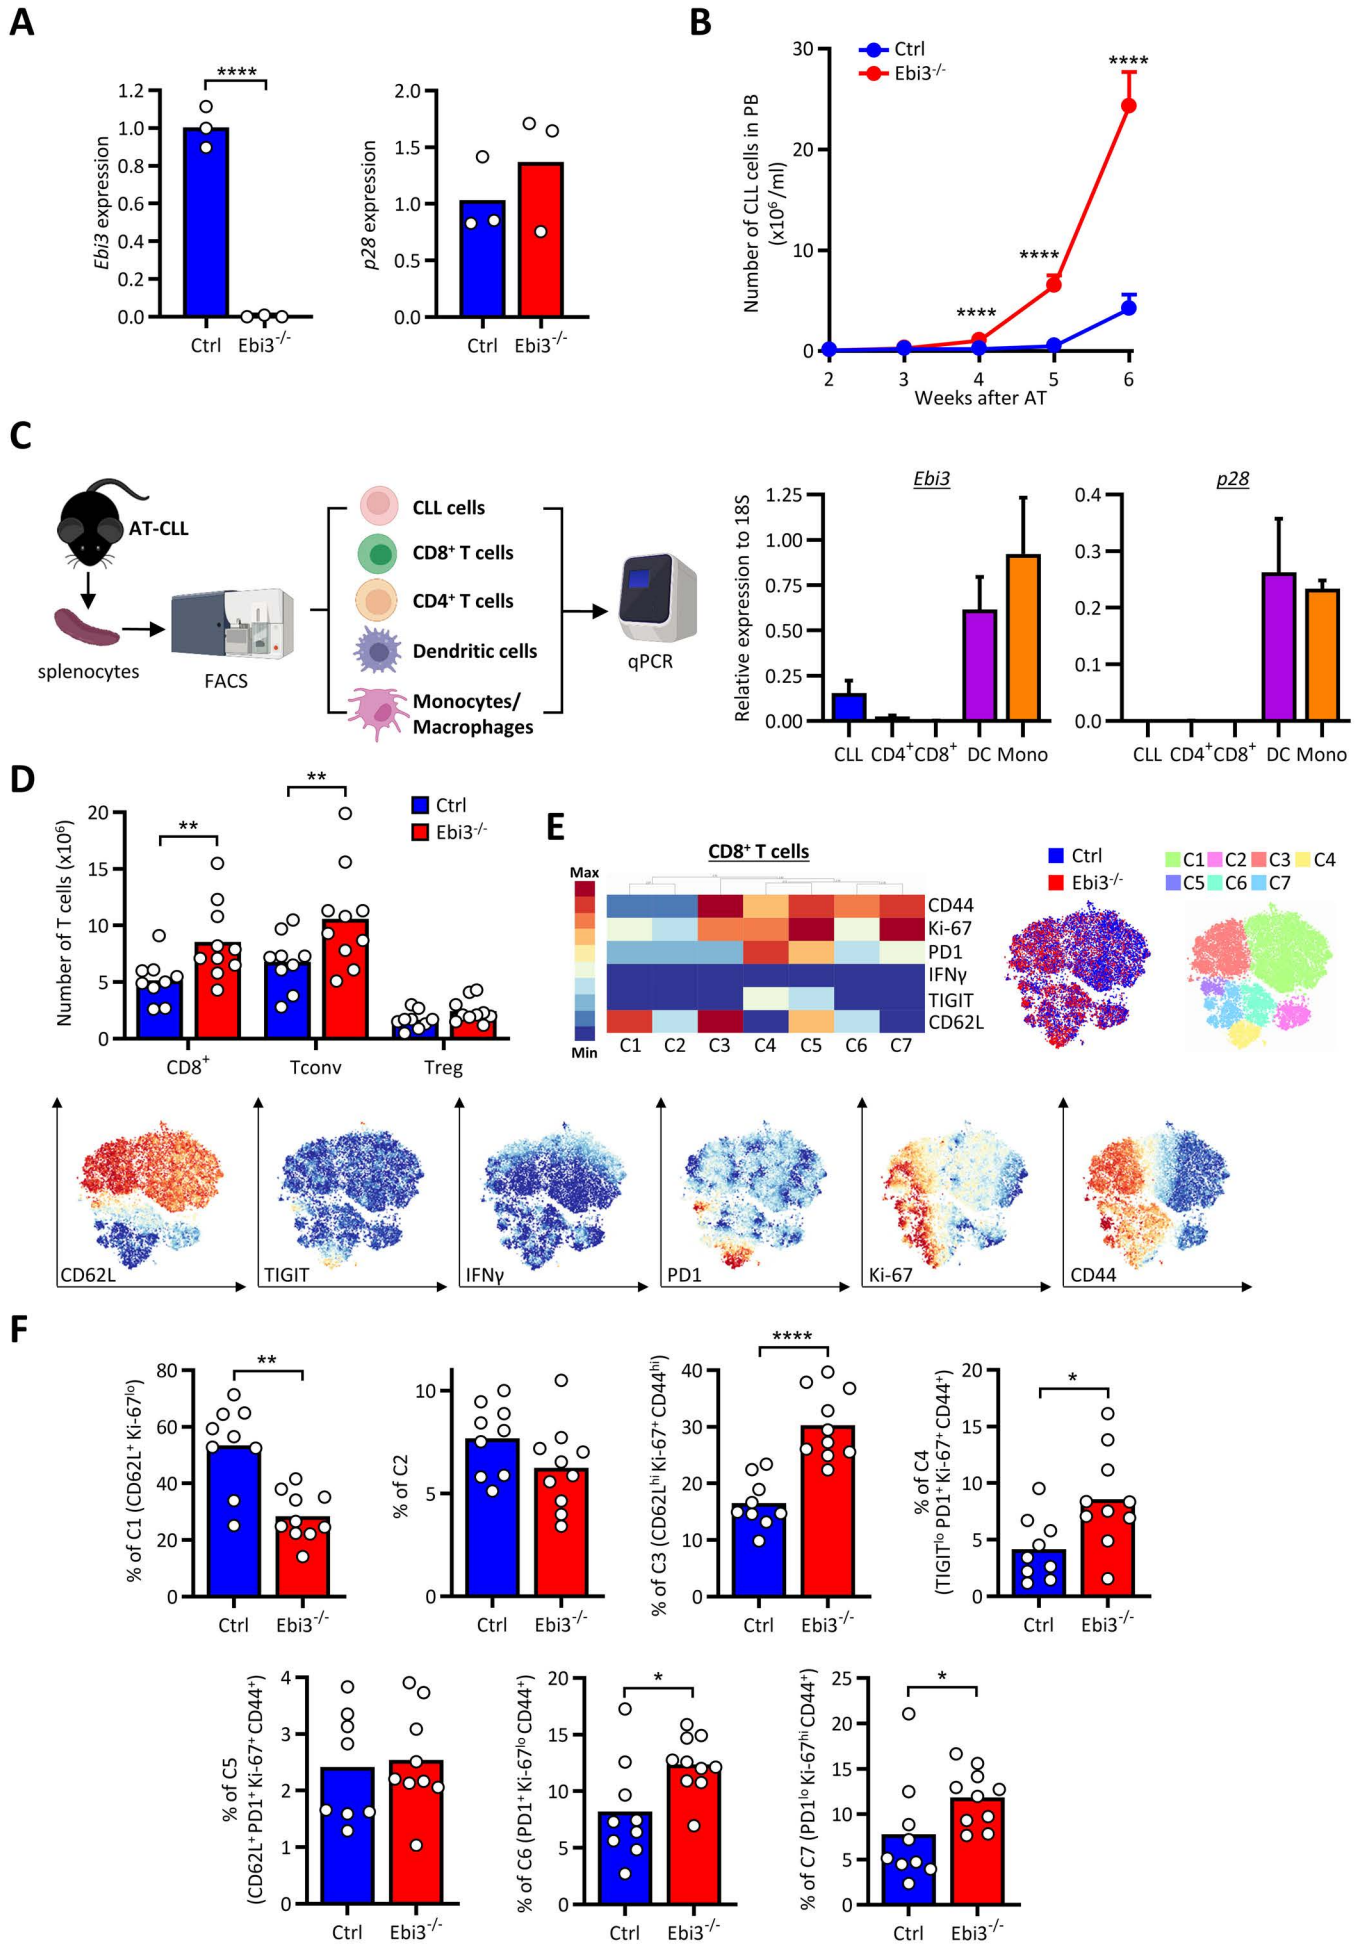

**Figure S1**

**G**

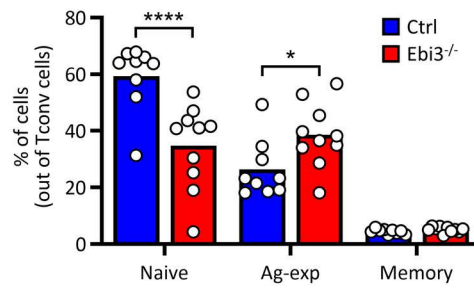

**H**

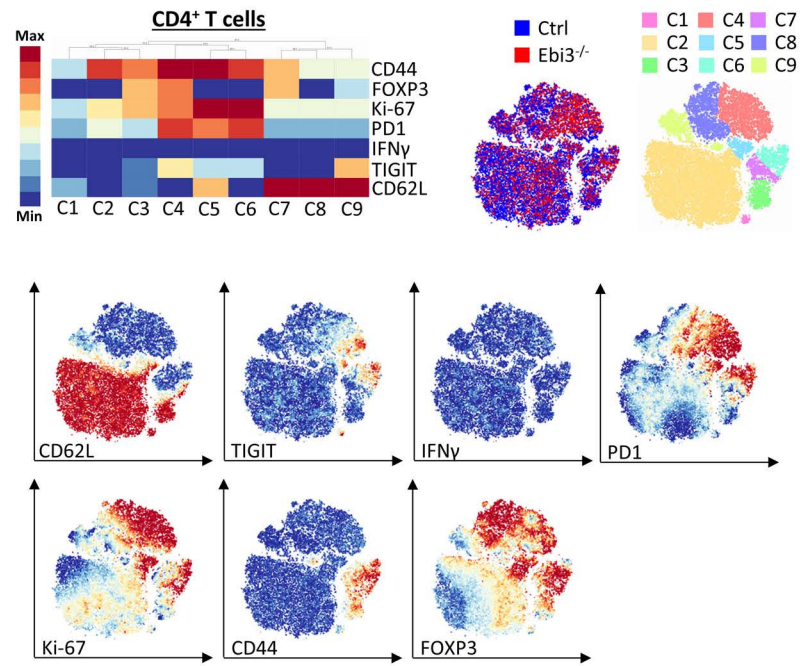

**I**

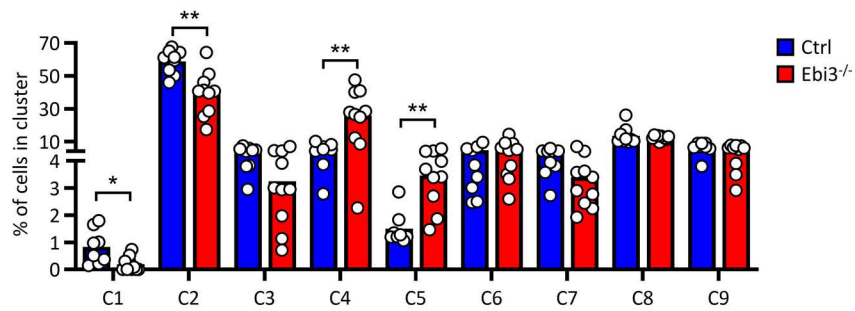

**Figure S2**

**A**

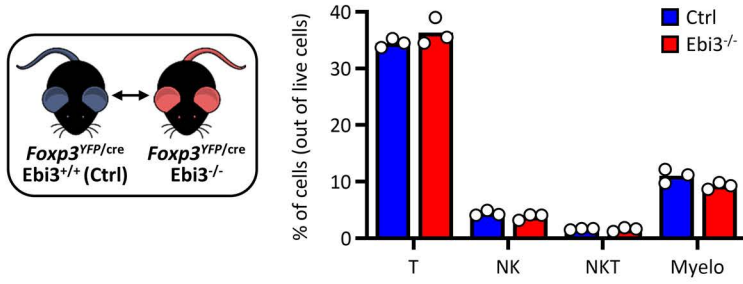

**B**

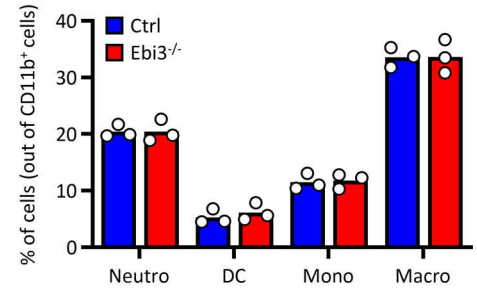

**C**

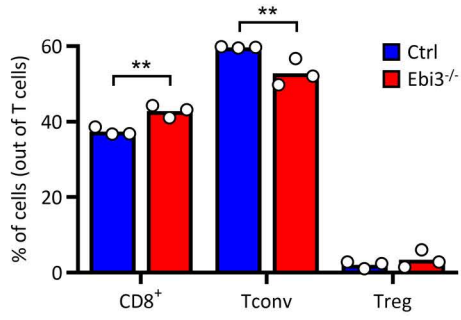

**D**

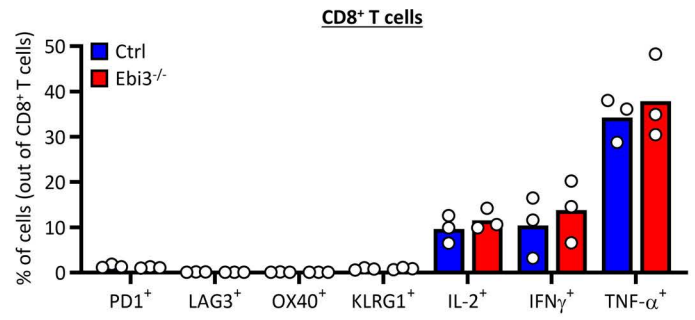

**E**

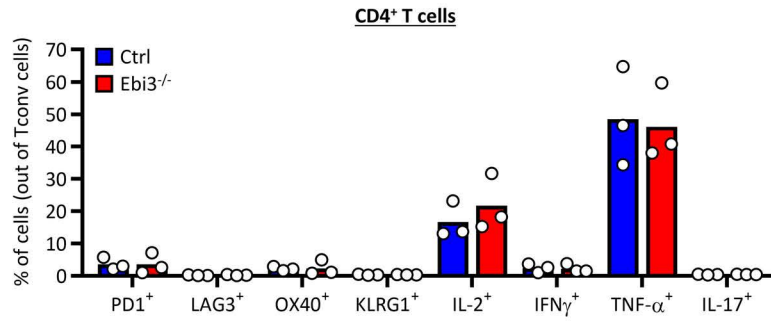

**F**

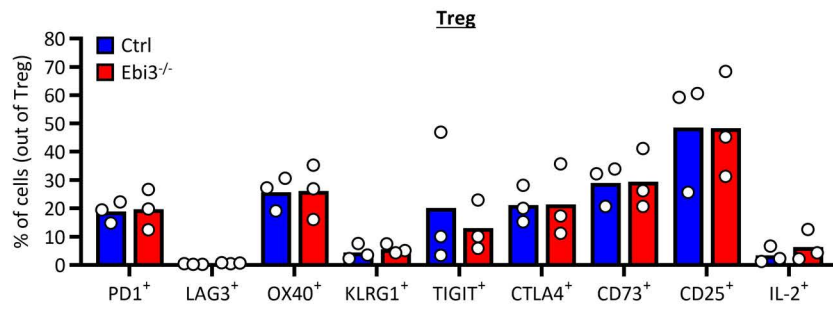

**Figure S3**

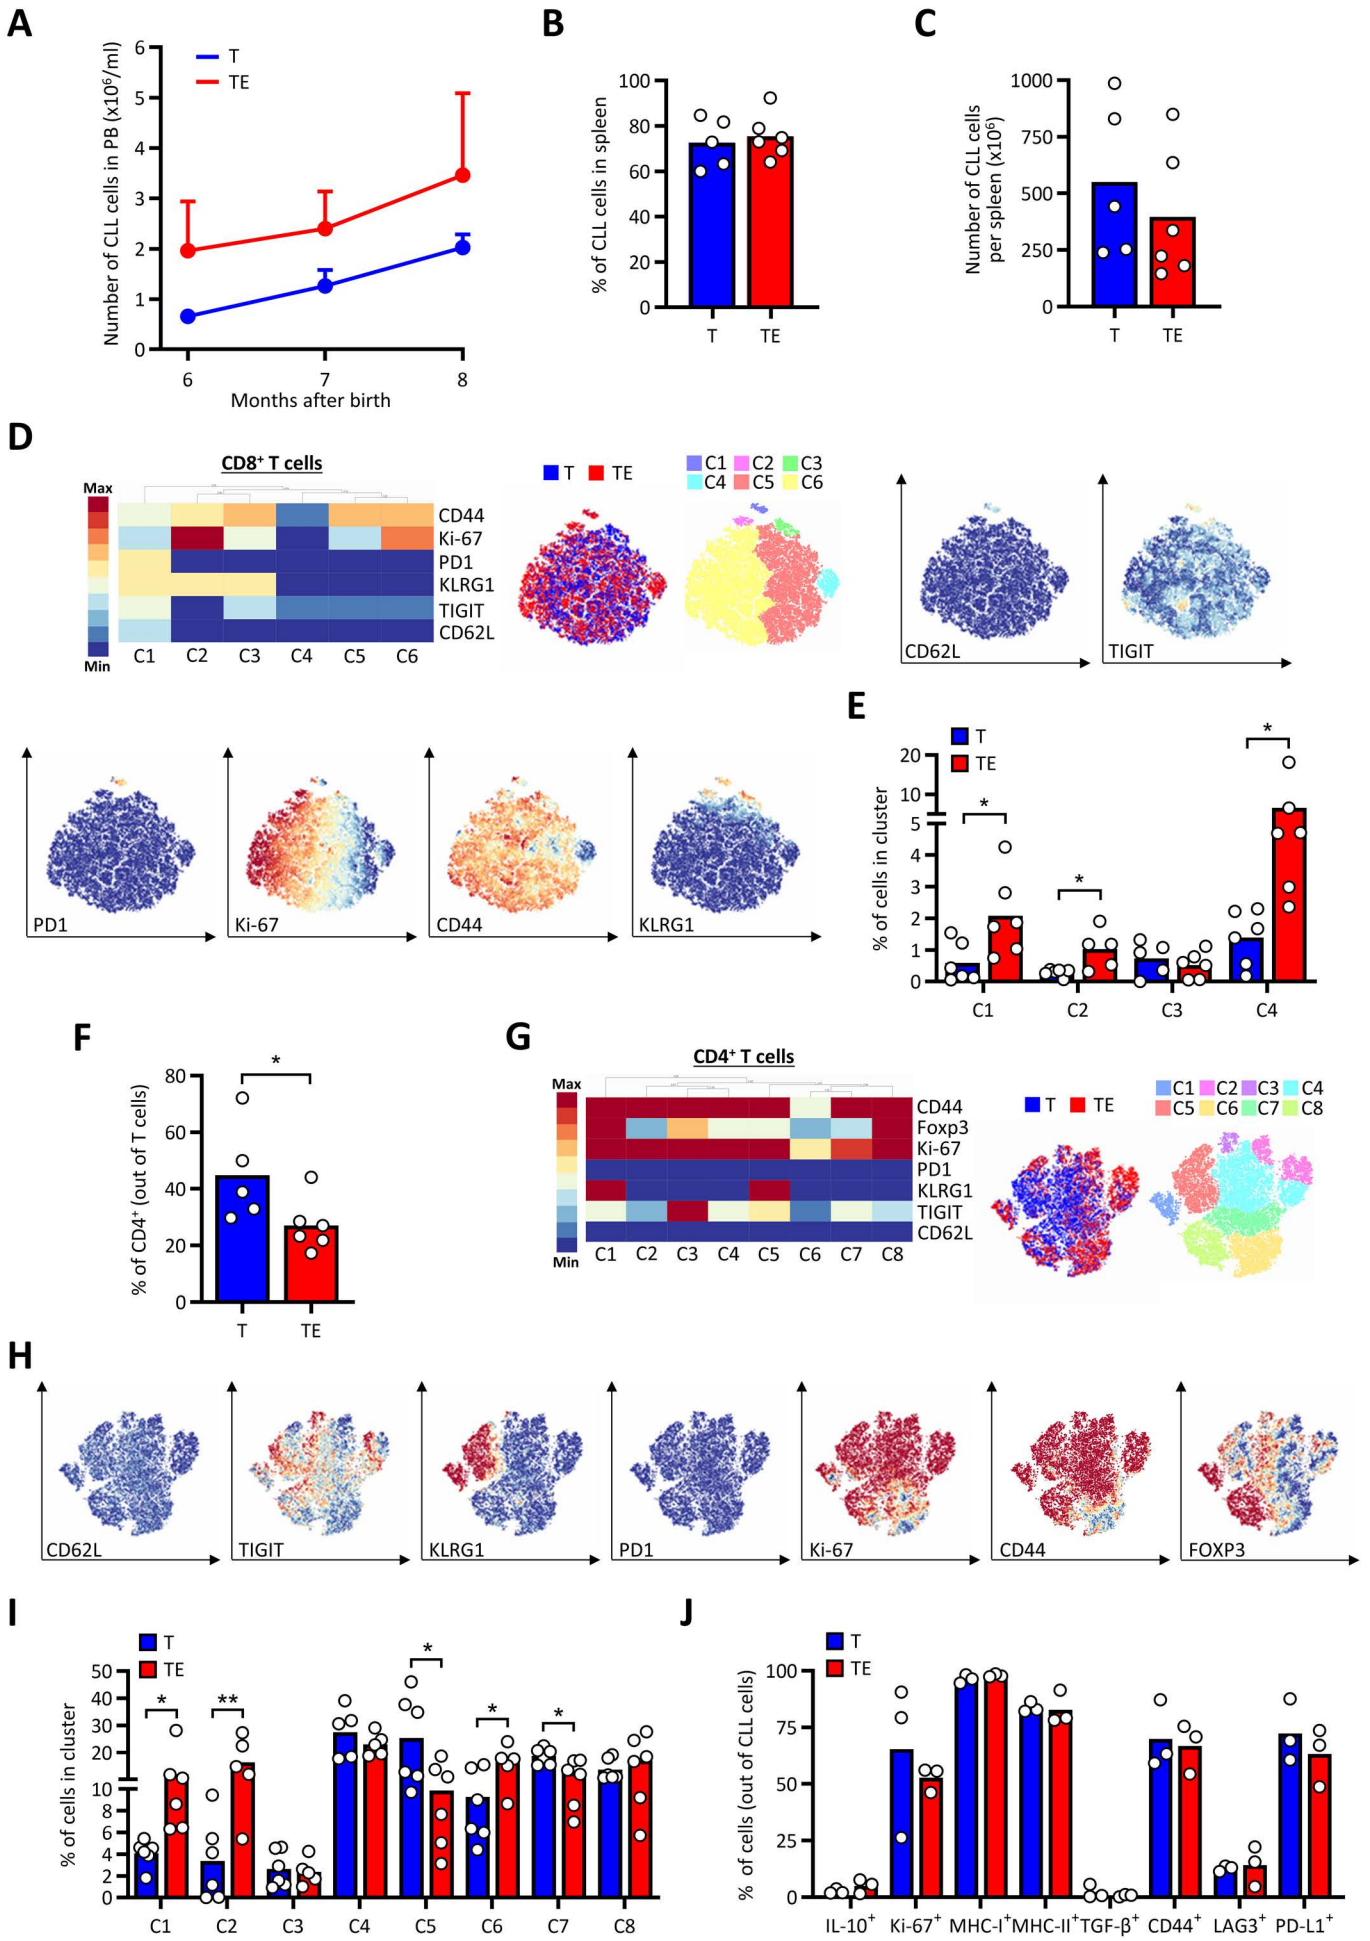

**Figure S4**

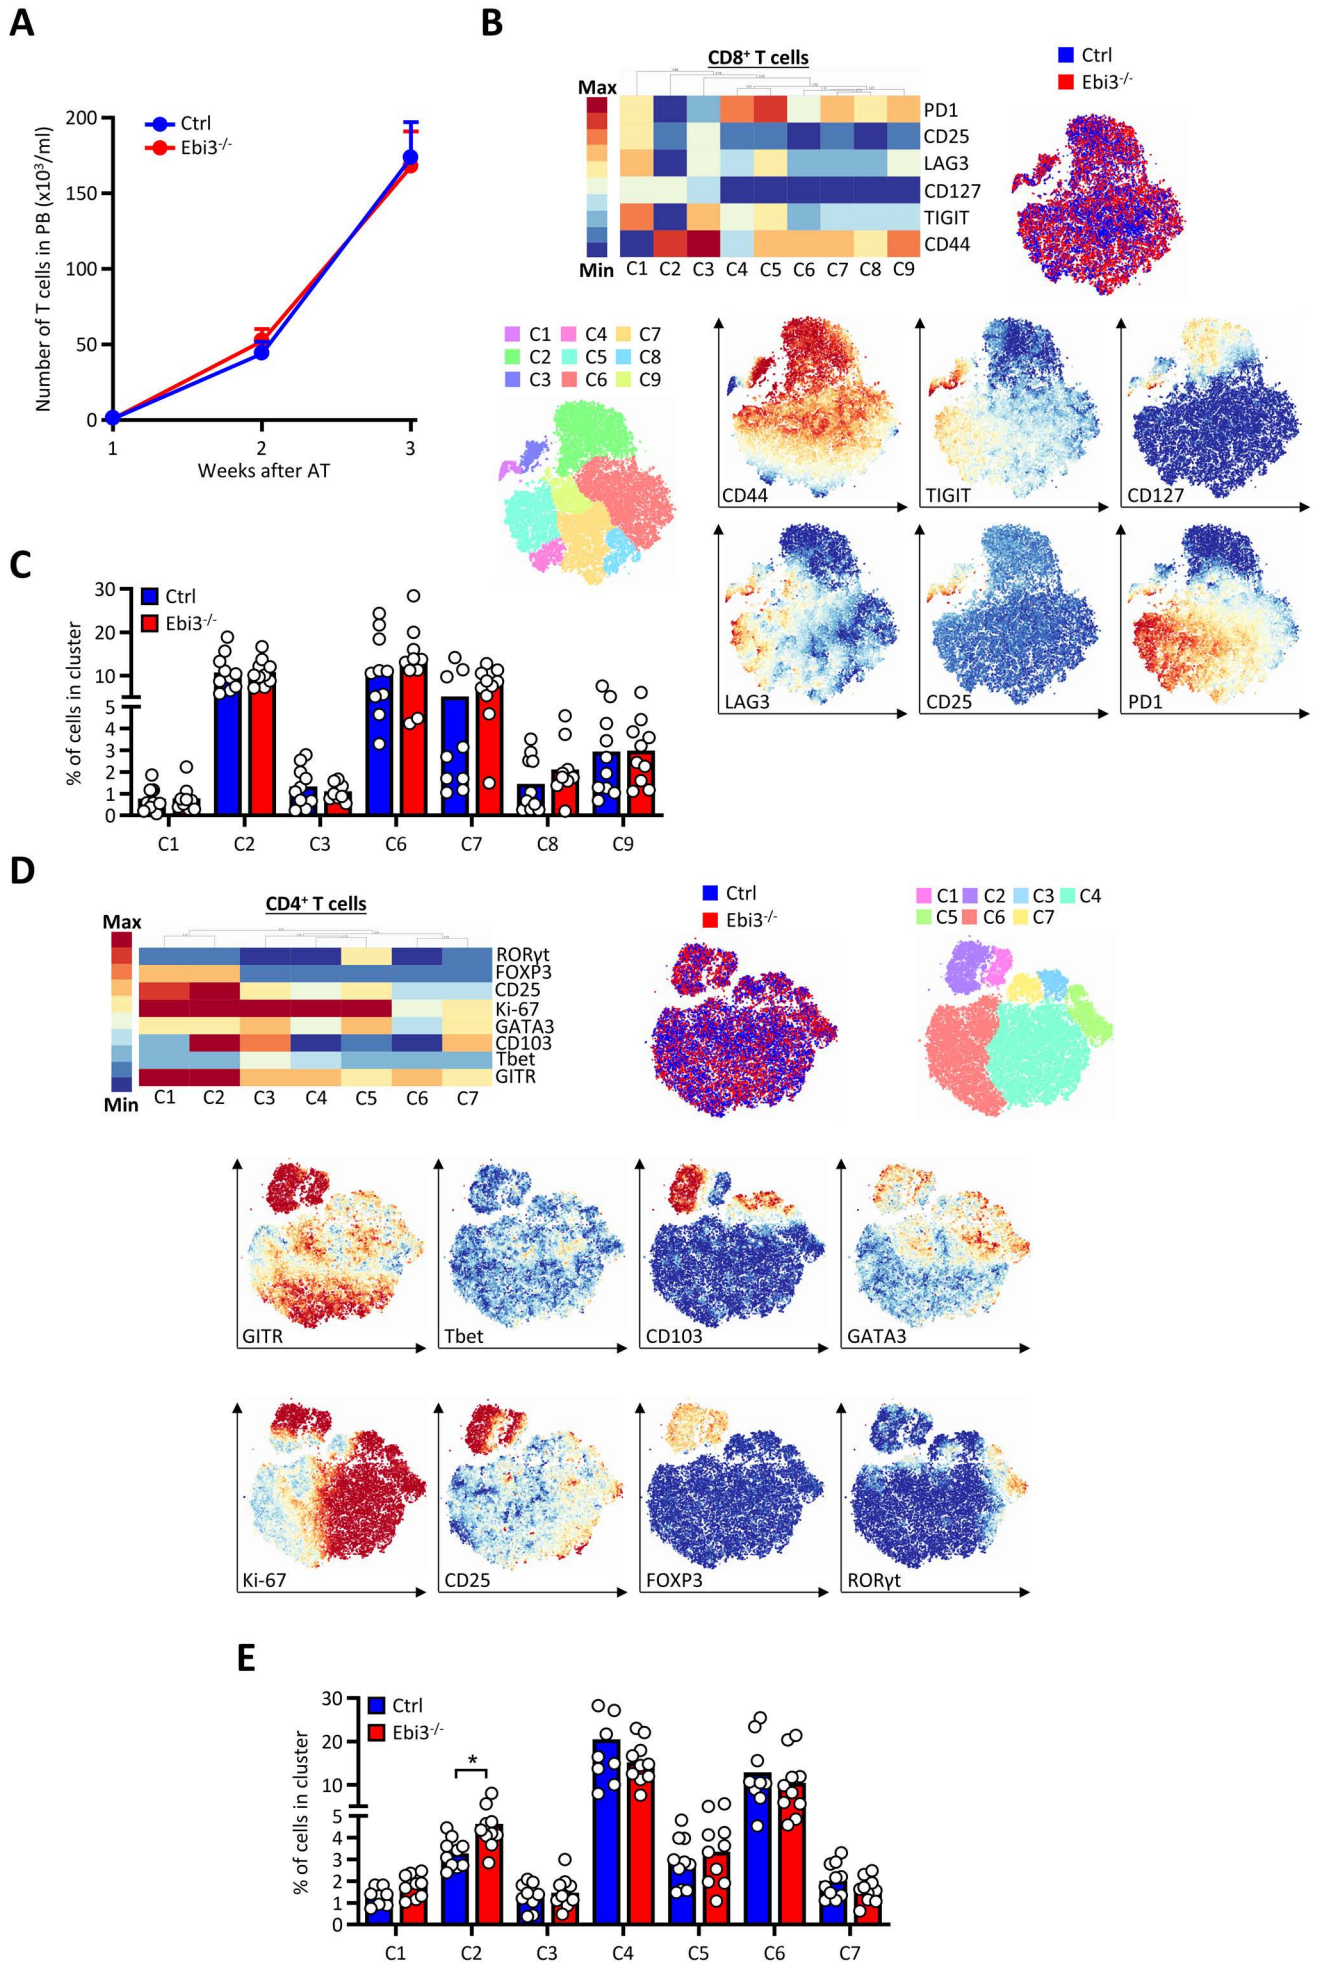

**Figure S5**

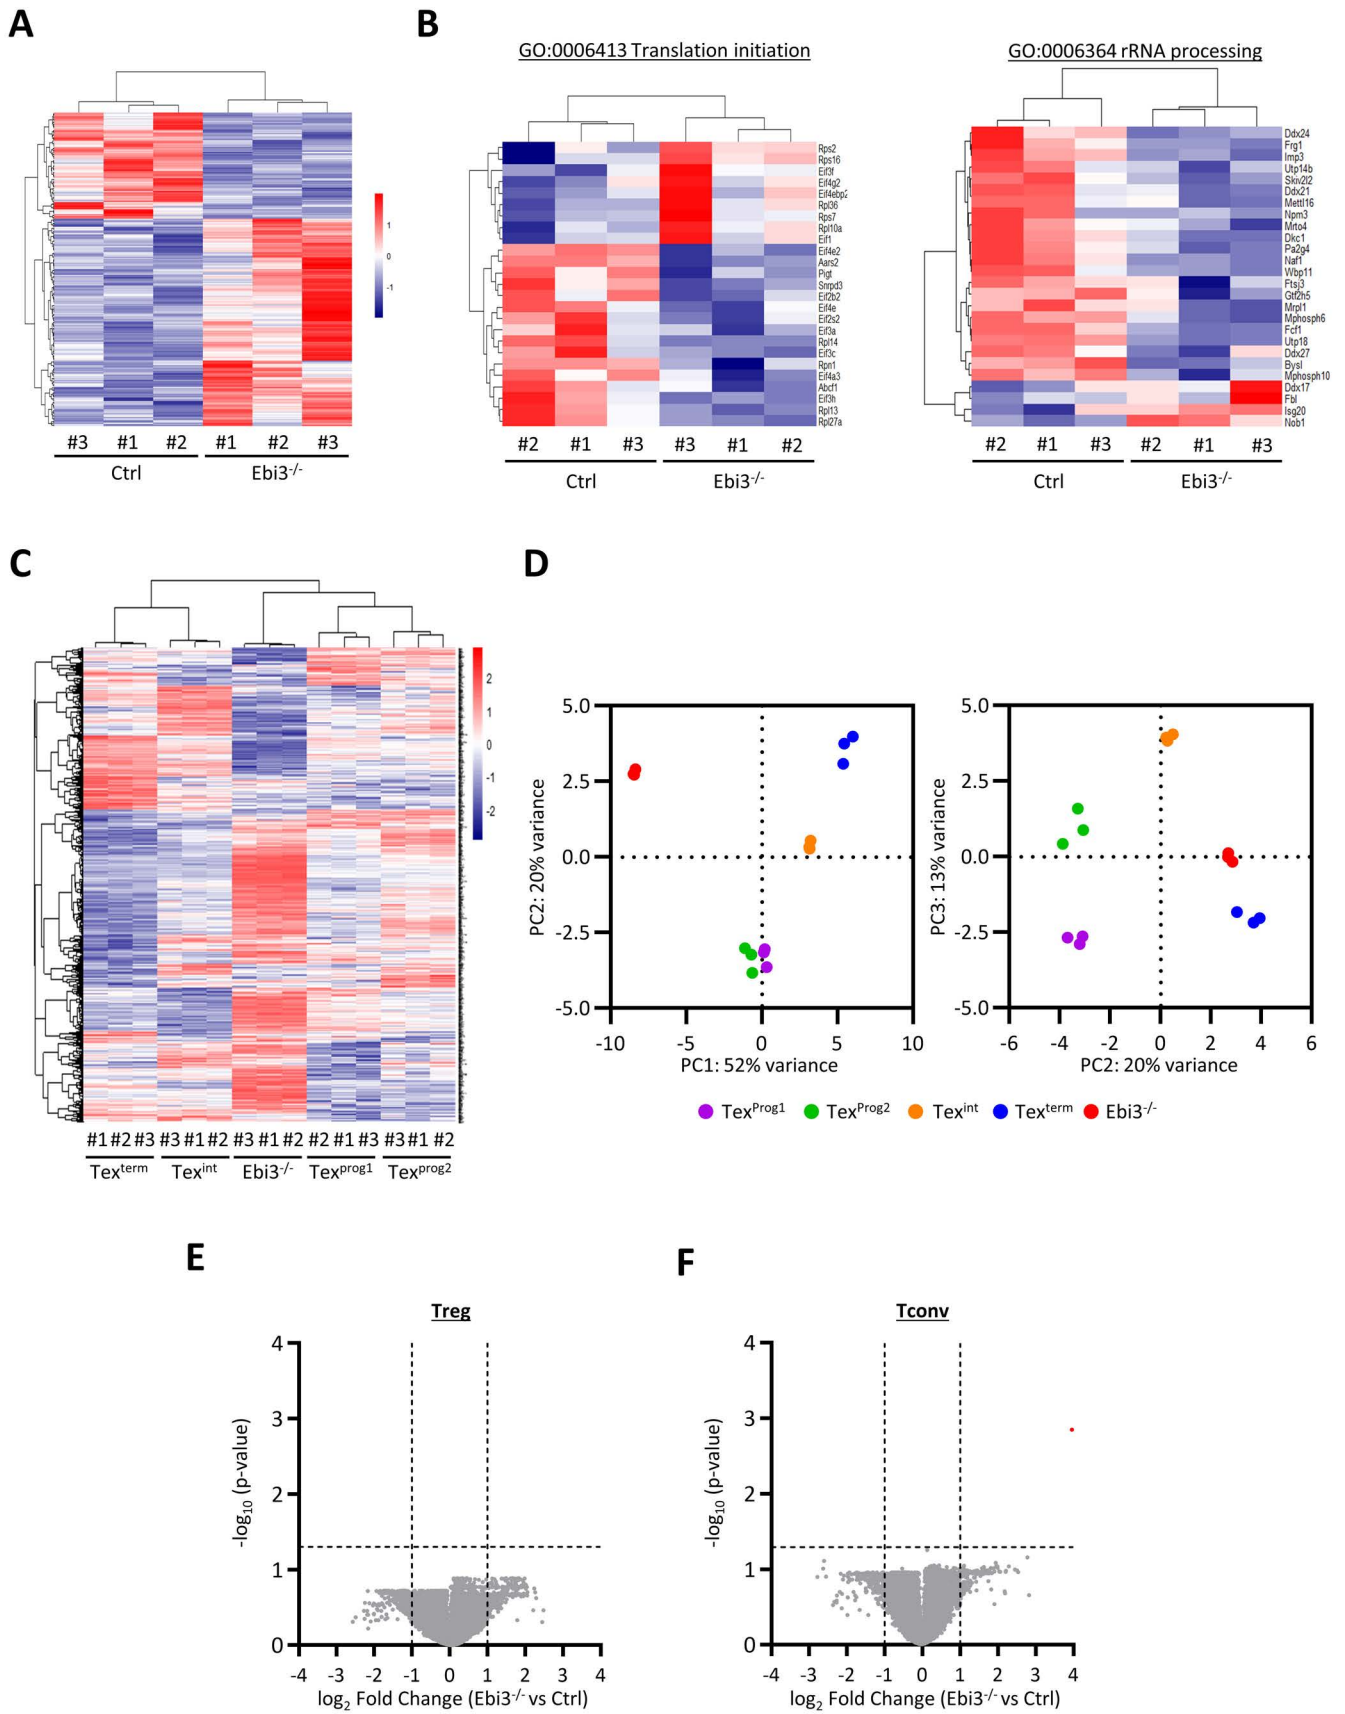

**Figure S6**

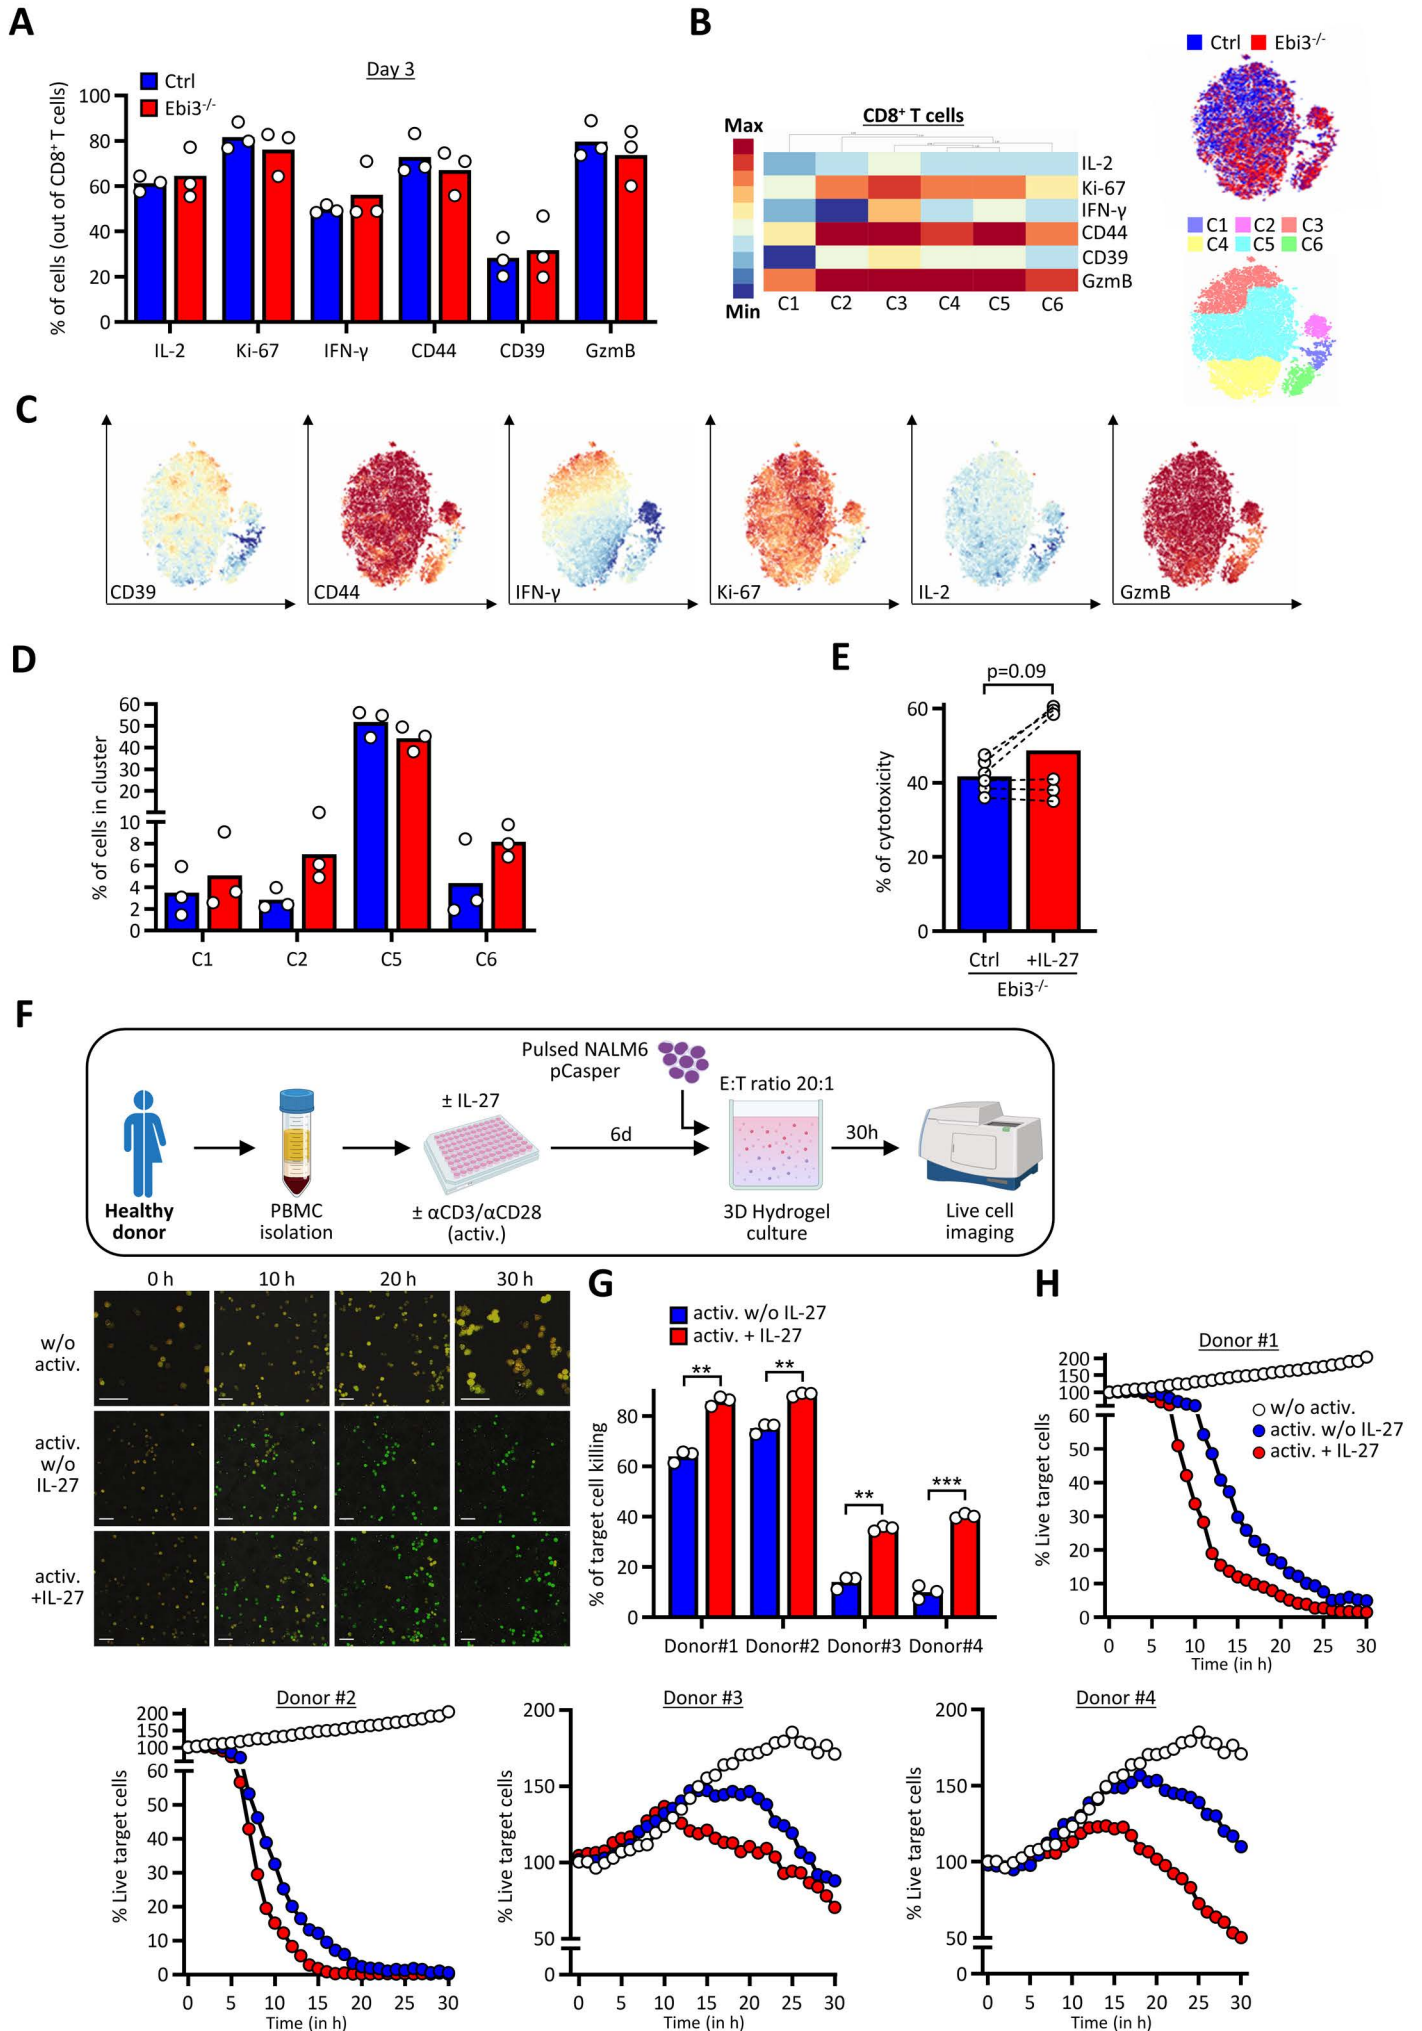

**Figure S7**

**A**

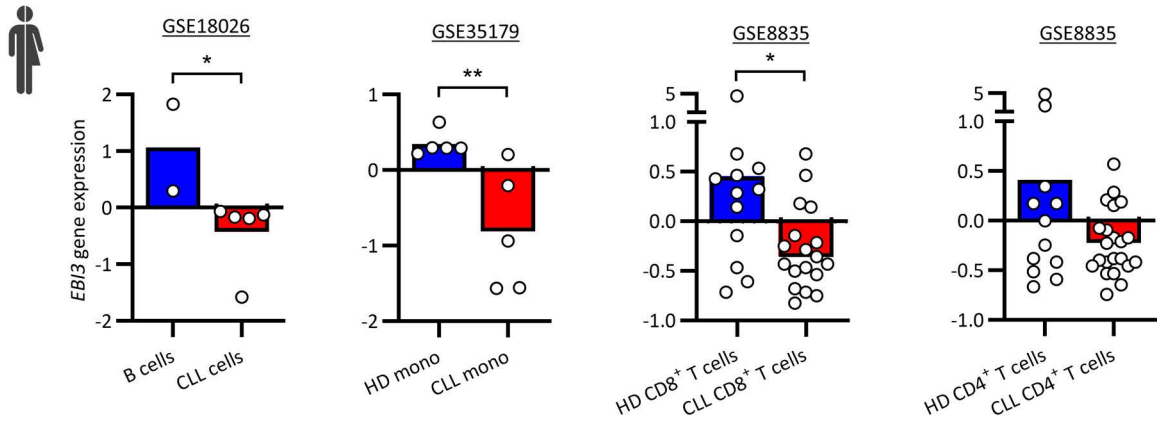

**B**

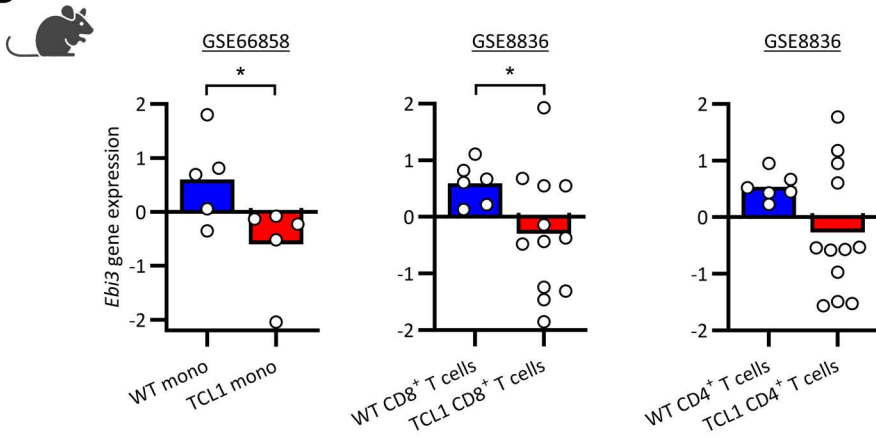

**C**

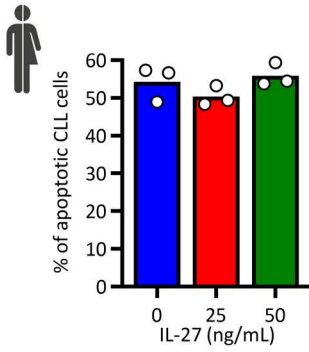

**D**

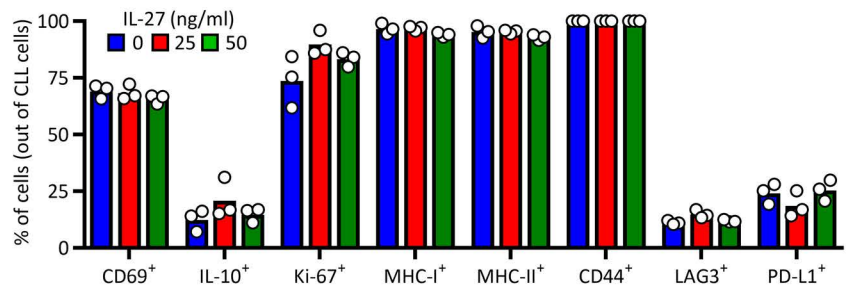

**E**

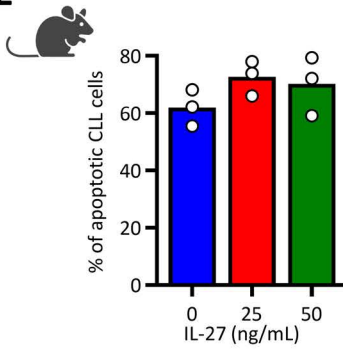

**F**

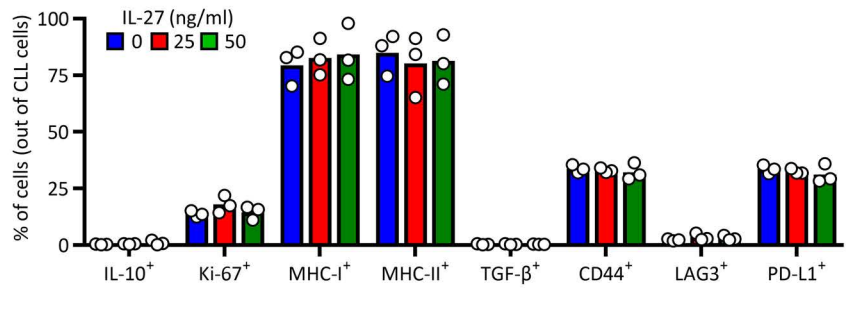

**Figure S8**

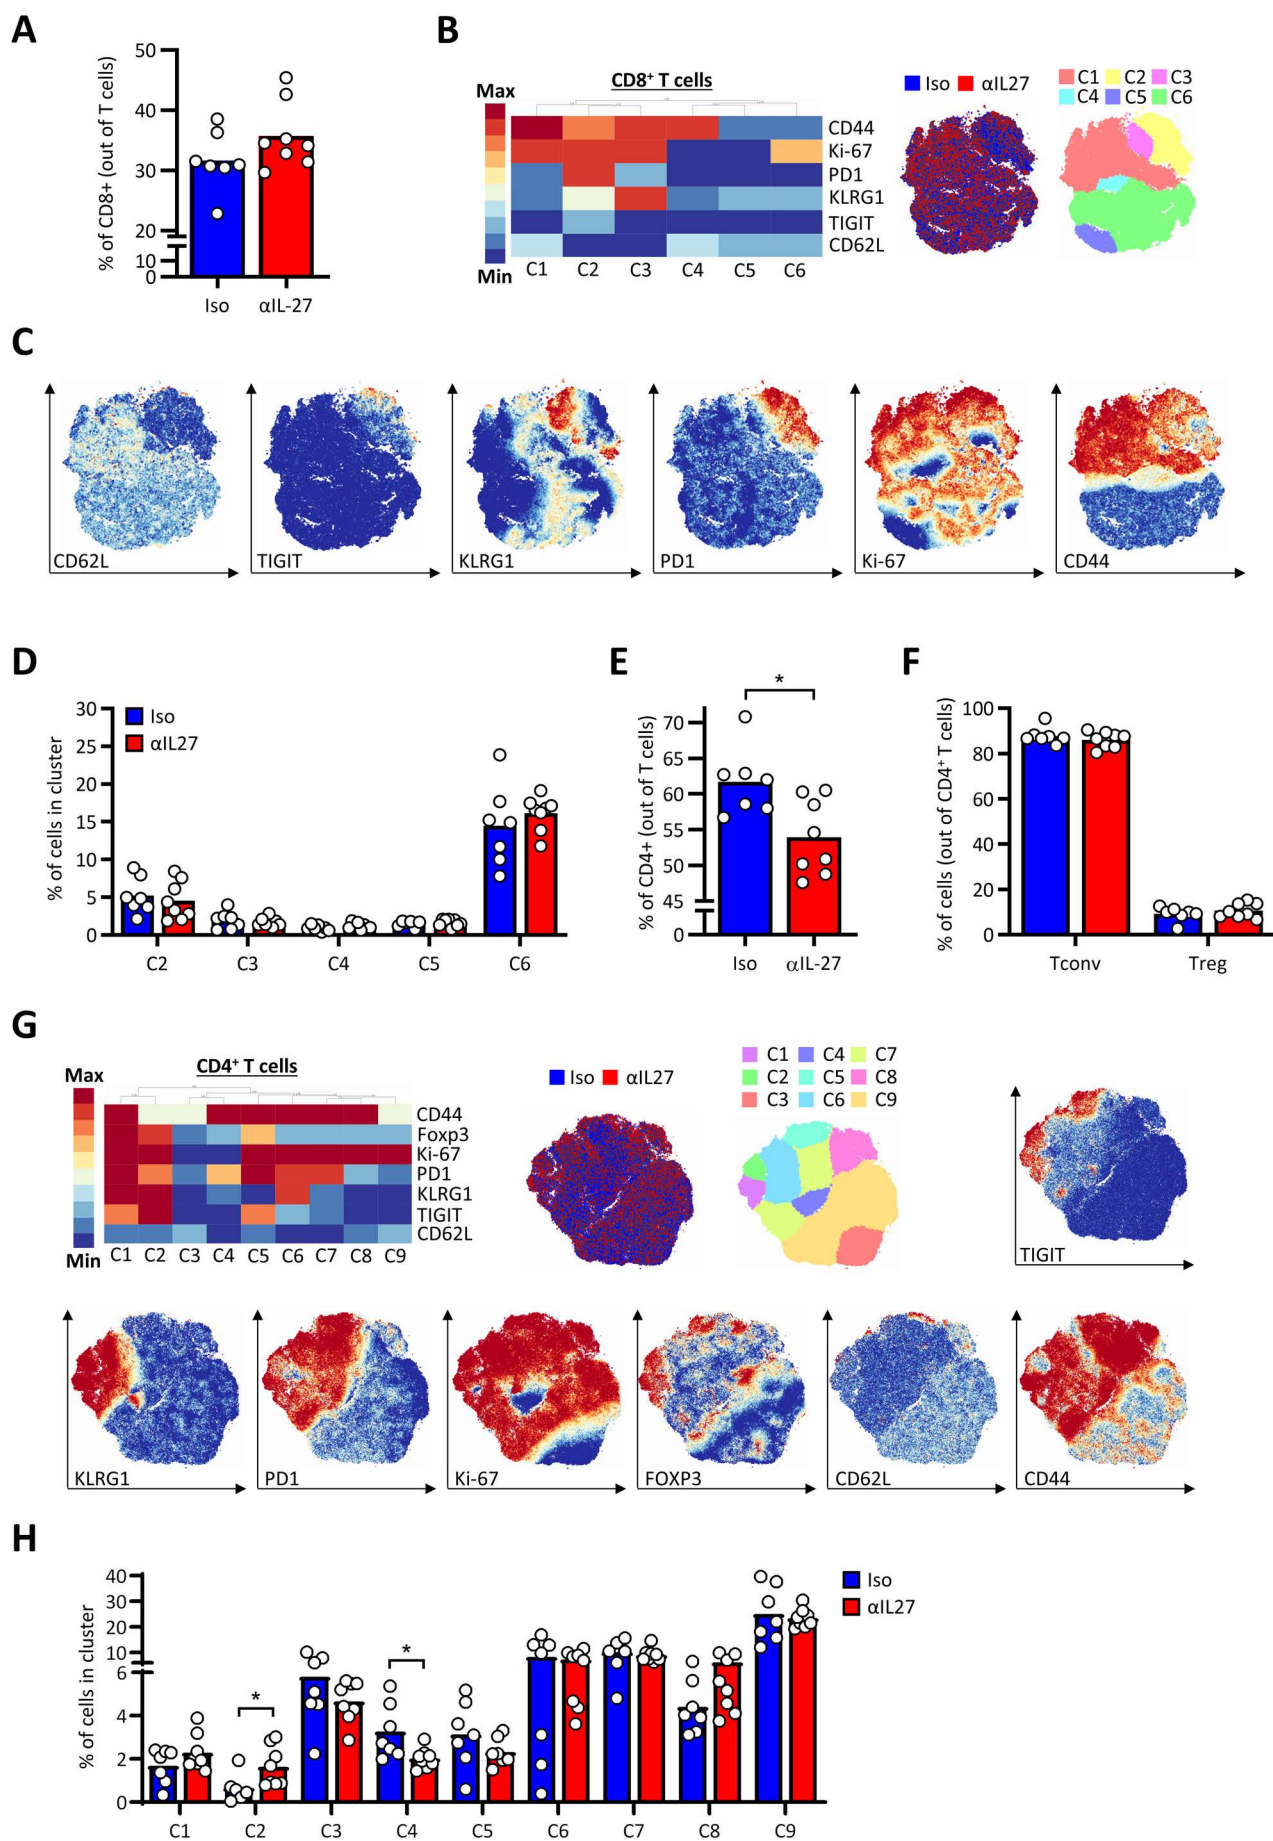

Supplement: 2022_282474_PAGANO_SUPPL.pdf [file 2022_282474_PAGANO_SUPPL.pdf]
